# Supplementary material for: Facile fabrication of a Z-scheme g-C3N5/Gd-MOF/silver nanocube composite as a new generation visible light active photocatalyst for abatement of persistent toxic pollutants
Source: Royal Society of Chemistry journal article supplement (doi:10.1039/d3en00913k), 2024-01-01
Supplement: d3en00913k1.pdf [file d3en00913k1.pdf]

## Electronic supplementary information

### Facile fabrication of Z-scheme g-C<sub>3</sub>N<sub>5</sub>/Gd-MOF/silver nanocubes composite as new generation visible light active photocatalyst for abatement of persistent toxic pollutants

Varsha UshaVipinachandran and Susanta Kumar Bhunia\*

Department of Chemistry, School of Advanced Sciences, Vellore Institute of Technology, Vellore, 632014, India

**Table S1** Effect of Cr<sup>6+</sup> reduction in presence of varied catalyst amount and Cr<sup>6+</sup> contaminated industrial raw water

| Concentration of Cr <sup>6+</sup>                  | Amount of CNGdAg-40 % | Cr <sup>6+</sup> reduction |
|----------------------------------------------------|-----------------------|----------------------------|
| 10 ppm                                             | 20 mg                 | 54 %                       |
|                                                    | 30 mg                 | 98 %                       |
|                                                    | 40 mg                 | 89 %                       |
| Cr <sup>6+</sup> contaminated industrial raw water | 30 mg                 | 66 %                       |

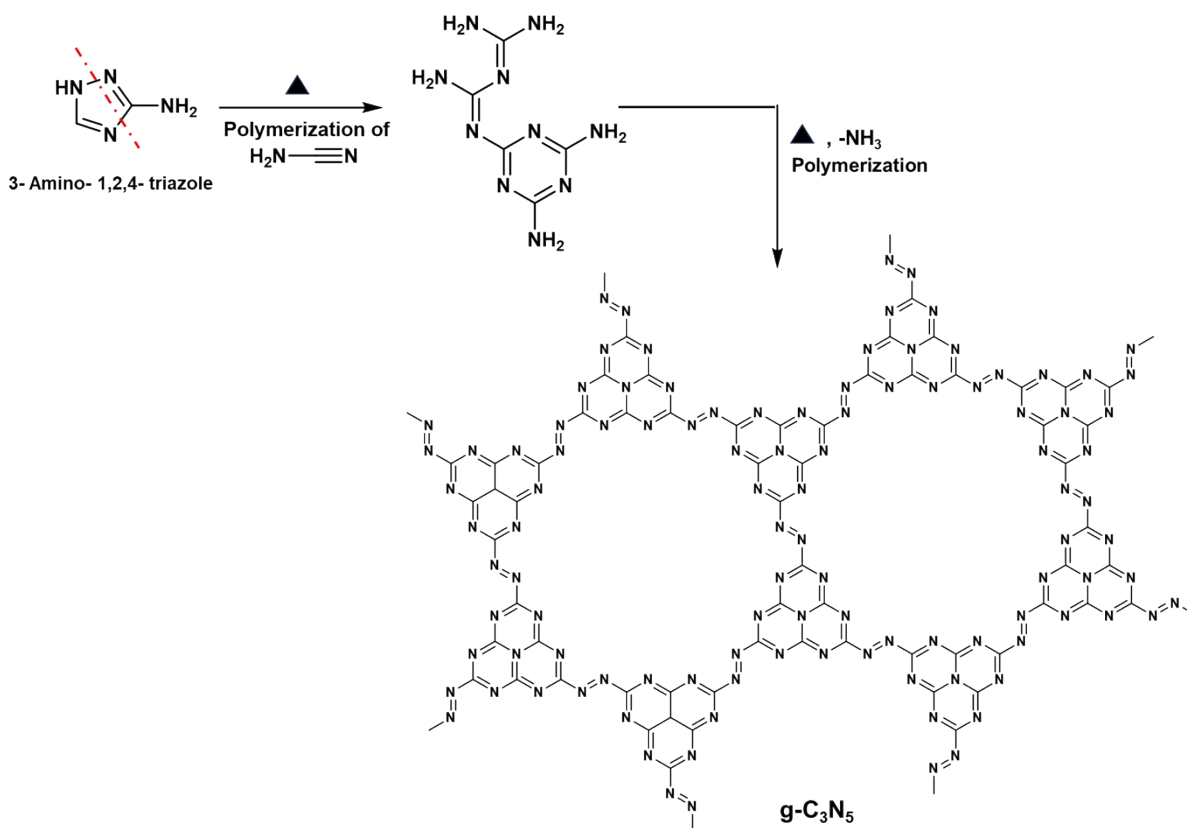

**Fig. S1** Synthetic route and structure of synthesized g-C<sub>3</sub>N<sub>5</sub>.

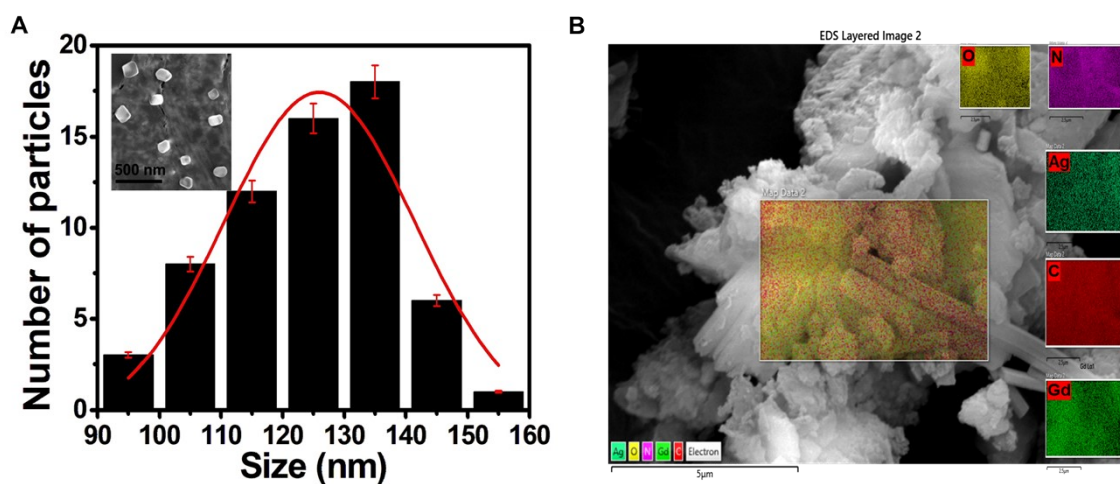

**Fig. S2 (A)** Size distribution histogram of AgNCs. Inset shows FESEM image of AgNCs. **(B)** Elemental analysis of CNGdAg-40 % showing the presence of C, O, N, Gd, and Ag.

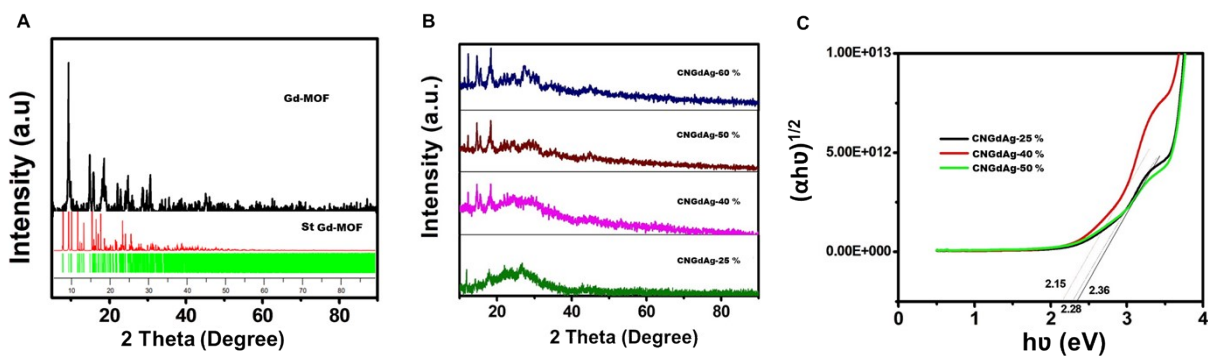

**Fig. S3** (A) XRD patterns of stimulated Gd-MOF ( $C_{23}H_{32}GdN_7O_{13}$ ) and as synthesized Gd-MOF. (B) XRD patterns of various loading of Gd-MOF with fixed amount of g- $C_3N_5$ . (C) Band gap measured from UV-DRS data.

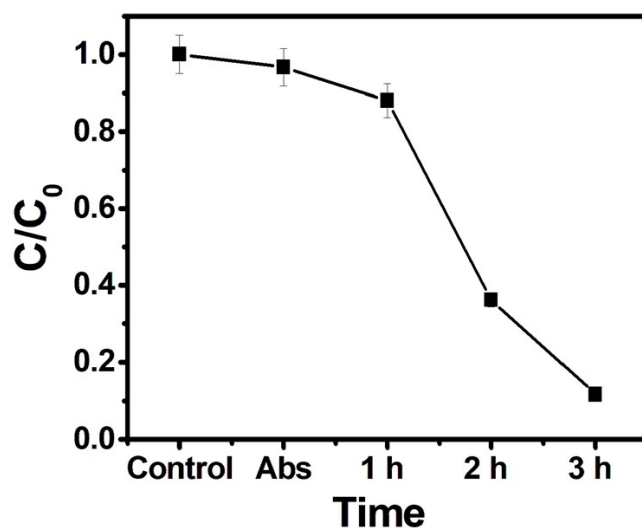

**Fig. S4** Degradation rate of  $Cr^{6+}$  at 25 ppm concentration using CNGdAg-40 %.

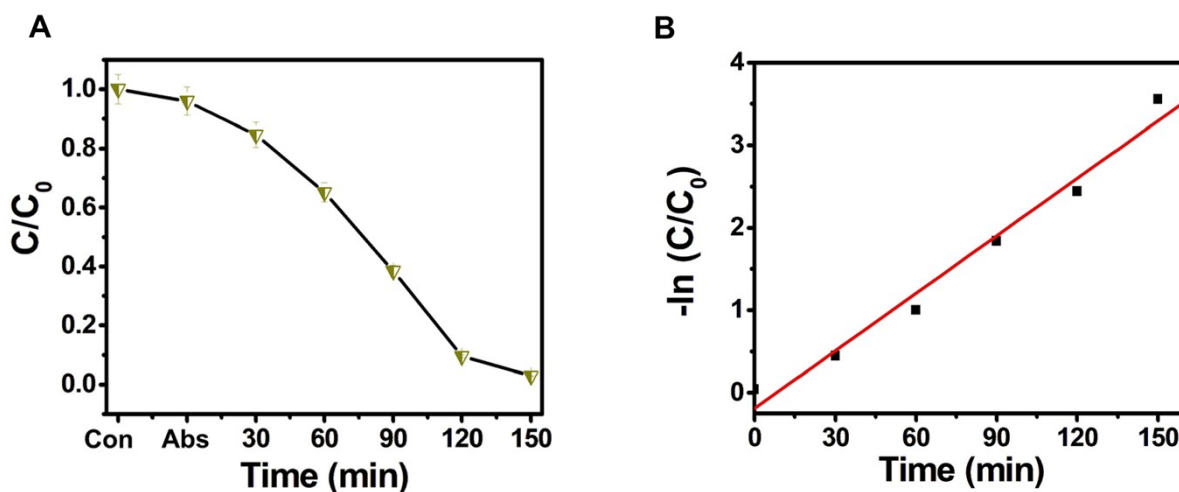

**Fig. S5** (A) Degradation and (B) kinetics rate of  $Cr^{6+}$  in the presence of CNGdAg-40 % with citric acid.

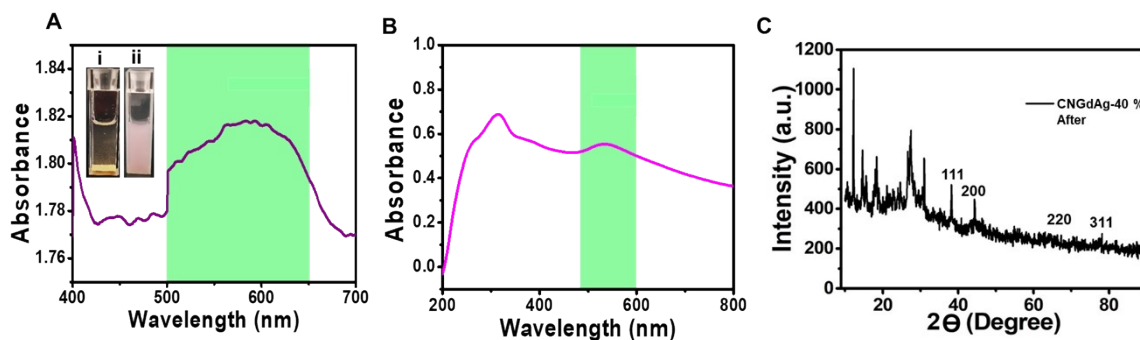

**Fig. S6** UV spectra of (A) Au nanoparticles dispersion in the presence of CNGdAg-40 % after irradiation. Inset images showing Au precursor with CNGdAg-40 % (i) before and (ii) after photolysis. (B) UV-Vis DRS spectrum of CNGdAg-40 % after photolysis. (C) XRD pattern of Au nanoparticles.

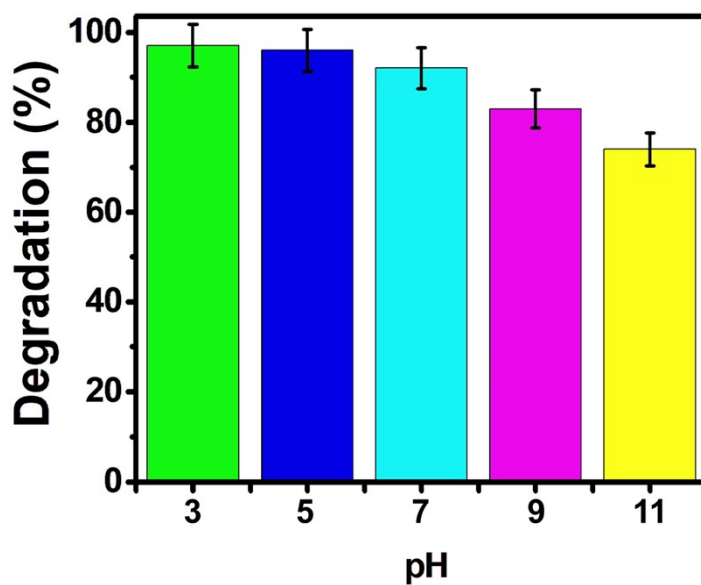

**Fig. S7** Photoreduction of  $\text{Cr}^{6+}$  under various pH conditions.

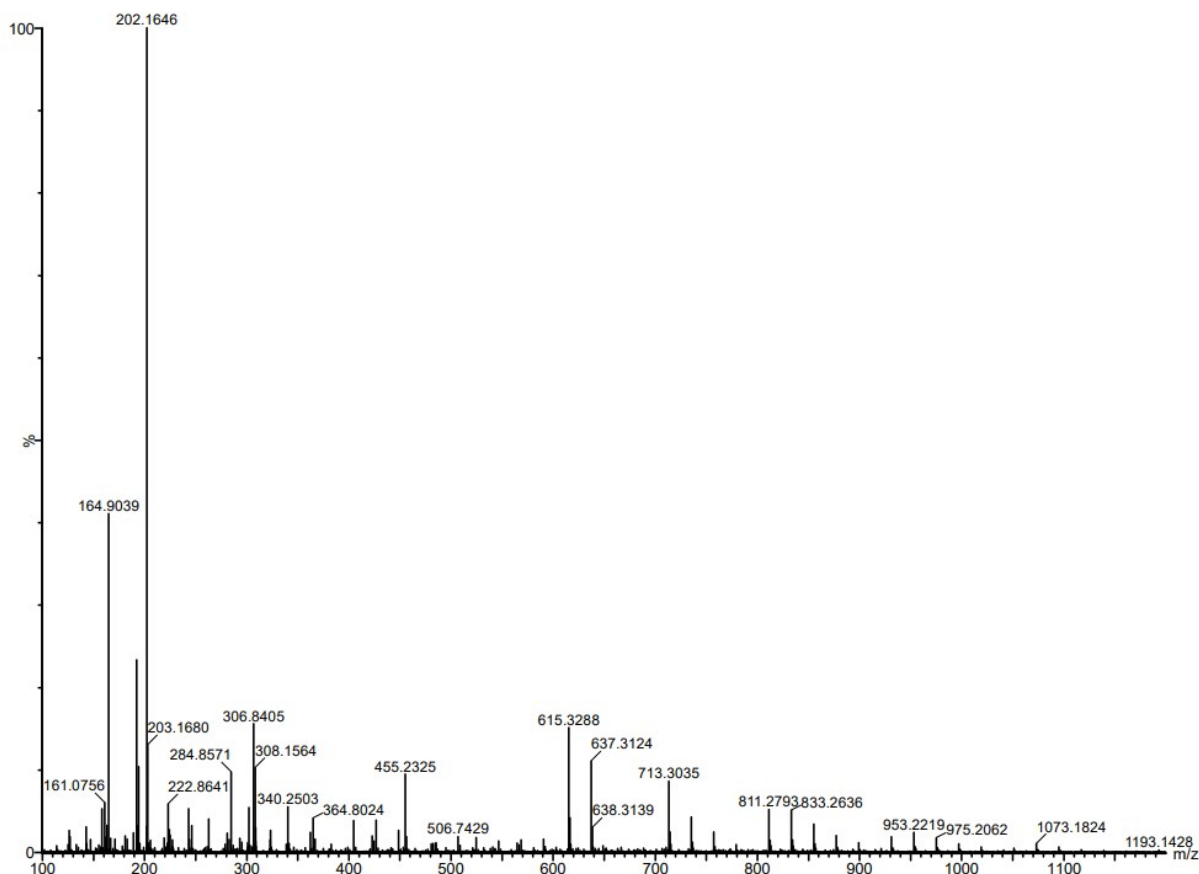

**Fig. S8** HRMS spectrum of degraded neomycin solution in 25 minutes irradiation in the presence of CNGdAg-40 %.

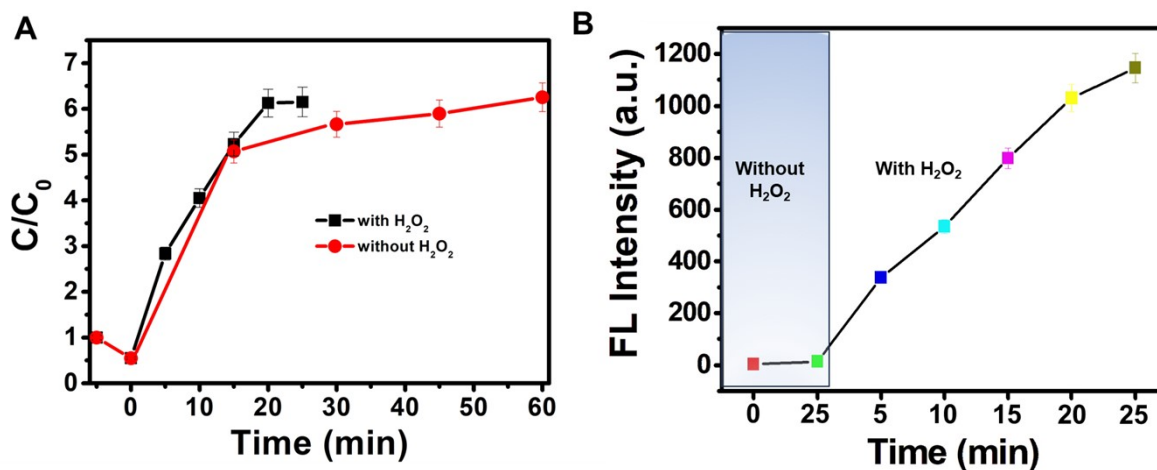

**Fig. S9** (A) Degradation rate of neomycin with and without  $H_2O_2$ . (B) Production of  $\cdot OH$  radicals in the presence of CNGdAg-40 % with and without  $H_2O_2$  under visible light irradiation.

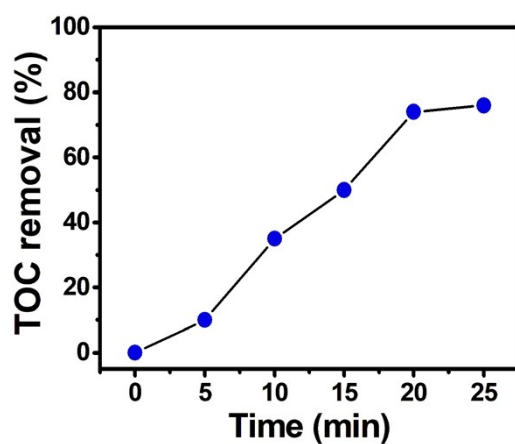

**Fig. S10** TOC removal rate of neomycin degradation.

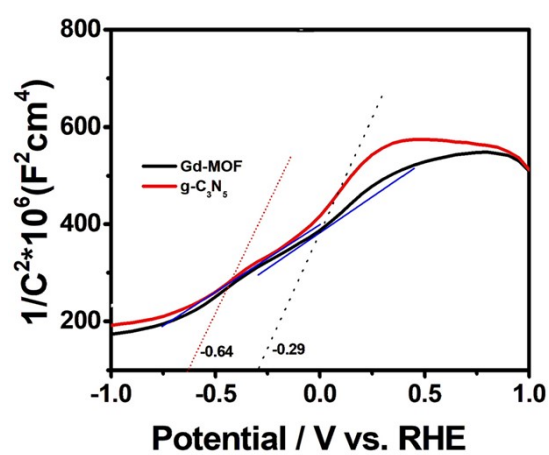

**Fig. S11** Mott-Schottky diagram of Gd-MOF, g-C<sub>3</sub>N<sub>5</sub>.

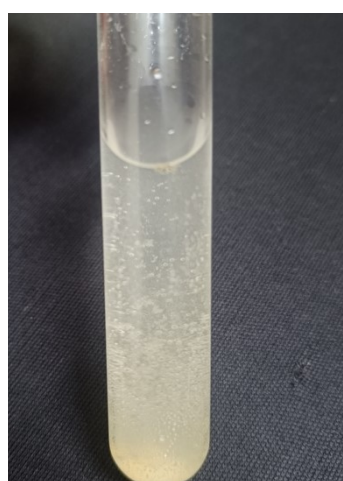

**Fig. S12** Confirmation test for the presence of carboxylic acid functional groups on CNGdAg-40 % surface.
